# Supplementary material
Source: PubMed Central journal article supplement (PMC7831684)
Supplement: mmc1.pdf [file mmc1.pdf]

## Online Appendix

# “COVID-19 Pandemic and Stock Market Response: A Culture Effect”

Adrian Fernandez-Perez<sup>a</sup>  
Aaron Gilbert<sup>a</sup>  
Ivan Indriawan<sup>a</sup>  
Nhut H. Nguyen<sup>a</sup>

<sup>a</sup> *Department of Finance, Auckland University of Technology, Auckland, New Zealand*



### Appendix IA2. Stock market response and culture for the [-2, +10] event window

This table reports the multivariate regression results of the cumulative abnormal returns (Panel A) and abnormal return volatility (Panel B) using the event window of [-2, +10] days. *CULTURE* is either the individualism index (IDV) or the uncertainty avoidance index (UAI). *GDDPC* is a country's gross domestic product per capita in natural log. *DENS* is the number of people per square kilometer of land in natural log. *CCASE* is the global cumulative infected cases on a country's first infected case date in natural log. *VIX* is the CBOE market volatility index on a country's first infected case date, and *GDPGRW* is the GDP annual growth in 2018. The White-corrected *t*-statistics are in parentheses. \*\*\*, \*\* and \* denote statistical significance at the 1%, 5%, and 10% levels, respectively.

|                        | Panel A: CAR <sub>[-2,+10]</sub> |                       | Panel B: AVOLA <sub>[-2,+10]</sub> |                     |
|------------------------|----------------------------------|-----------------------|------------------------------------|---------------------|
|                        | IDV                              | UAI                   | IDV                                | UAI                 |
| <i>CULTURE</i>         | 0.0017*<br>(1.79)                | -0.0010**<br>(-1.96)  | -0.0002*<br>(-1.91)                | 0.0002**<br>(2.48)  |
| <i>GDDPC</i>           | -0.0255<br>(-1.37)               | -0.0089<br>(-0.54)    | 0.0006<br>(0.28)                   | -0.0013<br>(-0.70)  |
| <i>DENS</i>            | 0.0113<br>(1.21)                 | 0.0024<br>(0.27)      | -0.0016<br>(-1.52)                 | -0.0003<br>(-0.33)  |
| <i>CCASE</i>           | -0.0196***<br>(-3.70)            | -0.0125**<br>(-2.26)  | 0.0020**<br>(2.53)                 | 0.0009<br>(1.13)    |
| <i>VIX</i>             | -0.0062***<br>(-3.71)            | -0.0072***<br>(-3.88) | 0.0009***<br>(4.56)                | 0.0011***<br>(5.25) |
| <i>GDPGRW</i>          | 0.0006<br>(0.07)                 | -0.0011<br>(-0.11)    | -0.0012<br>(-0.87)                 | -0.0008<br>(-0.51)  |
| <i>Constant</i>        | 0.3045<br>(1.53)                 | 0.2895<br>(1.36)      | 0.0011<br>(0.05)                   | -0.0035<br>(-0.13)  |
| Adj-R <sup>2</sup> (%) | 49.83                            | 48.02                 | 56.74                              | 57.28               |
| Obs.                   | 63                               | 63                    | 63                                 | 63                  |

### Appendix IA3. Robustness using cumulative absolute abnormal return

This table reports the multivariate regression results of the cumulative absolute abnormal returns (CAAR). Panels A and B report the results for event windows of [-2, +5] and [-2, +15] days, respectively. *CULTURE* is either the individualism index (IDV) or the uncertainty avoidance index (UAI). *GDDPC* is a country's gross domestic product per capita in natural log. *DENS* is the number of people per square kilometer of land in natural log. *CCASE* is the global cumulative infected cases on a country's first infected case date in natural log. *VIX* is the CBOE market volatility index on a country's first infected case date, and *GDPGRW* is the GDP annual growth in 2018. The White-corrected *t*-statistics are in parentheses. \*\*\*, \*\* and \* denote statistical significance at the 1%, 5%, and 10% levels, respectively.

|                        | Panel A: CAAR <sub>[-2,+5]</sub> |                     | Panel B: CAAR <sub>[-2,+15]</sub> |                    |
|------------------------|----------------------------------|---------------------|-----------------------------------|--------------------|
|                        | IDV                              | UAI                 | IDV                               | UAI                |
| <i>CULTURE</i>         | -0.0018***<br>(-2.62)            | 0.0013***<br>(2.82) | -0.0043**<br>(-2.43)              | 0.0028**<br>(2.26) |
| <i>GDDPC</i>           | 0.0021<br>(0.17)                 | -0.0142<br>(-1.18)  | 0.0005<br>(0.01)                  | -0.0408<br>(-1.24) |
| <i>DENS</i>            | -0.0104<br>(-1.58)               | -0.0005<br>(-0.08)  | -0.0350*<br>(-1.89)               | -0.0120<br>(-0.63) |
| <i>CCASE</i>           | 0.0104**<br>(2.15)               | 0.0020<br>(0.41)    | 0.0571***<br>(3.03)               | 0.0382**<br>(2.01) |
| <i>VIX</i>             | 0.0052***<br>(3.88)              | 0.0064***<br>(4.79) | 0.0072*<br>(1.94)                 | 0.0098**<br>(2.54) |
| <i>GDPGRW</i>          | -0.0101<br>(-1.27)               | -0.0073<br>(-0.88)  | -0.0290<br>(-1.31)                | -0.0238<br>(-1.00) |
| <i>Constant</i>        | 0.0619<br>(0.45)                 | 0.0492<br>(0.32)    | 0.1557<br>(0.39)                  | 0.1688<br>(0.38)   |
| Adj-R <sup>2</sup> (%) | 52.80                            | 51.65               | 50.78                             | 48.60              |
| Obs.                   | 63                               | 63                  | 63                                | 63                 |

#### Appendix IA4. Stock market return and culture (with other possible explanations)

This table reports the results for the multivariate regressions of CAR over the [-2, +15] day event window on IDV (Panel A) or UAI (Panel B) as a culture proxy. *ΔSTRINGENCY* is the change in Stringency Index within the event window. *DEMO* is the level of democracy. *CORRUPT* is the political corruption index. *SARS* is the dummy variable for countries with SARS deaths in 2003. *OPEN* is the ratio of a country's foreign trade over its GDP. *FOREIGN* is the percentage of foreign ownerships in 2017. *SERVICE* is the value of the Services sector as a proportion of a country's total GDP. *DEATH* is an indicator variable which equals one when there is at least one death in a country within the event window and zero otherwise. *OUTBREAK* is a dummy variable equal one after the WHO COVID-19 outbreak declaration on January 30, 2020. The White-corrected *t*-statistics are in parentheses. \*\*\*, \*\* and \* denote statistical significance at the 1%, 5%, and 10% levels, respectively. Other controls include *GDDPC*, *DENS*, *CCASE*, *VIX*, and *GDPGRW*. Detailed variable definitions are in 'Appendix' Table 6.

| Culture Coefficient | <i>t</i> -stat | Characteristics    | Coefficient | <i>t</i> -stat | Controls | Adj-R2 | Obs. |
|---------------------|----------------|--------------------|-------------|----------------|----------|--------|------|
| <b>Panel A: IDV</b> |                |                    |             |                |          |        |      |
| 0.0025***           | (2.71)         | <i>ΔSTRINGENCY</i> | -0.0023**   | (-2.25)        | YES      | 48.2   | 62   |
| 0.0035***           | (3.73)         | <i>DEMO</i>        | -0.0111*    | (-1.76)        | YES      | 43.5   | 62   |
| 0.0030***           | (3.39)         | <i>CORRUPT</i>     | -0.0354     | (-0.28)        | YES      | 41.6   | 62   |
| 0.0031***           | (3.49)         | <i>SARS</i>        | -0.0055     | (-0.15)        | YES      | 42.3   | 63   |
| 0.0031***           | (3.19)         | <i>OPEN</i>        | -0.0002     | (-0.51)        | YES      | 41.8   | 62   |
| 0.0047***           | (4.77)         | <i>FOREIGN</i>     | -0.3369*    | (-1.71)        | YES      | 55.4   | 51   |
| 0.0035***           | (3.47)         | <i>SERVICE</i>     | -0.0034     | (-1.08)        | YES      | 43.7   | 63   |
| 0.0022***           | (3.00)         | <i>DEATH</i>       | -0.1879***  | (-4.39)        | YES      | 57.9   | 63   |
| 0.0029***           | (3.38)         | <i>OUTBREAK</i>    | -0.1605**   | (-2.28)        | YES      | 46.6   | 63   |
| <b>Panel B: UAI</b> |                |                    |             |                |          |        |      |
| -0.0011             | (-1.52)        | <i>ΔSTRINGENCY</i> | -0.0025**   | (-2.45)        | YES      | 44.6   | 62   |
| -0.0015*            | (-1.84)        | <i>DEMO</i>        | -0.0036     | (-0.61)        | YES      | 36.5   | 62   |
| -0.0013             | (-1.44)        | <i>CORRUPT</i>     | -0.1089     | (-0.83)        | YES      | 37.1   | 62   |
| -0.0017**           | (-1.99)        | <i>SARS</i>        | -0.0509     | (-1.07)        | YES      | 37.5   | 63   |
| -0.0017**           | (-1.96)        | <i>OPEN</i>        | -0.0004     | (-1.33)        | YES      | 37.6   | 62   |
| -0.0015             | (-1.65)        | <i>FOREIGN</i>     | -0.1951     | (-0.93)        | YES      | 42.3   | 51   |
| -0.0015*            | (-1.85)        | <i>SERVICE</i>     | -0.0008     | (-0.27)        | YES      | 37.1   | 63   |
| -0.0010             | (-1.38)        | <i>DEATH</i>       | -0.2003***  | (-4.53)        | YES      | 55.1   | 63   |
| -0.0012             | (-1.33)        | <i>OUTBREAK</i>    | -0.1590**   | (-2.07)        | YES      | 41.0   | 63   |

## Appendix IA5. Stock market volatility and culture (with other possible explanations)

This table reports the results for the multivariate regressions of AVOLA over the [-2, +15] day event window on IDV (Panel A) or UAI (Panel B) as a culture proxy.  $\Delta$ STRINGENCY is the change in Stringency Index within the event window. DEMO is the level of democracy. CORRUPT is the political corruption index. SARS is the dummy variable for countries with SARS deaths in 2003. OPEN is the ratio of a country's foreign trade over its GDP. FOREIGN is the percentage of foreign ownerships in 2017. SERVICE is the value of the Services sector as a proportion of a country's total GDP. DEATH is an indicator variable which equals one when there is at least one death in a country within the event window and zero otherwise. OUTBREAK is a dummy variable equal one after the WHO COVID-19 outbreak declaration on January 30, 2020. The White-corrected  $t$ -statistics are in parentheses. \*\*\*, \*\* and \* denote statistical significance at the 1%, 5%, and 10% levels, respectively. Other controls include GDDPC, DENS, CCASE, VIX, and GDPGRW. Detailed variable definitions are in 'Appendix' Table 6.

| Culture Coefficient | $t$ -stat | Characteristics     | Coefficient | $t$ -stat | Controls | Adj-R2 | Obs. |
|---------------------|-----------|---------------------|-------------|-----------|----------|--------|------|
| <b>Panel A: IDV</b> |           |                     |             |           |          |        |      |
| -0.0002*            | (-1.69)   | $\Delta$ STRINGENCY | 0.0003***   | (4.43)    | YES      | 61.6   | 62   |
| -0.0003**           | (-2.39)   | DEMO                | 0.0008      | (1.44)    | YES      | 52.3   | 62   |
| -0.0003**           | (-2.00)   | CORRUPT             | 0.0016      | (0.11)    | YES      | 51.6   | 62   |
| -0.0003**           | (-2.29)   | SARS                | 0.0030      | (0.63)    | YES      | 52.4   | 63   |
| -0.0003**           | (-2.07)   | OPEN                | 0.0000      | (0.36)    | YES      | 51.9   | 62   |
| -0.0003***          | (-2.83)   | FOREIGN             | 0.0152      | (0.83)    | YES      | 58.3   | 51   |
| -0.0003**           | (-2.02)   | SERVICE             | 0.0001      | (0.27)    | YES      | 52.3   | 63   |
| -0.0002*            | (-1.82)   | DEATH               | 0.0158***   | (3.73)    | YES      | 60.6   | 63   |
| -0.0003**           | (-2.18)   | OUTBREAK            | 0.0122*     | (1.78)    | YES      | 54.1   | 63   |
| <b>Panel B: UAI</b> |           |                     |             |           |          |        |      |
| 0.0001*             | (1.94)    | $\Delta$ STRINGENCY | 0.0003***   | (4.51)    | YES      | 60.9   | 62   |
| 0.0002**            | (2.49)    | DEMO                | 0.0001      | (0.13)    | YES      | 50.2   | 62   |
| 0.0002**            | (2.30)    | CORRUPT             | 0.0058      | (0.46)    | YES      | 50.3   | 62   |
| 0.0002***           | (2.93)    | SARS                | 0.0086*     | (1.73)    | YES      | 51.7   | 63   |
| 0.0002***           | (2.56)    | OPEN                | 0.0000      | (1.48)    | YES      | 50.9   | 62   |
| 0.0002**            | (2.36)    | FOREIGN             | 0.0062      | (0.32)    | YES      | 55.0   | 51   |
| 0.0002**            | (2.45)    | SERVICE             | -0.0001     | (-0.63)   | YES      | 50.6   | 63   |
| 0.0002**            | (2.00)    | DEATH               | 0.0166***   | (3.92)    | YES      | 59.9   | 63   |
| 0.0002**            | (2.02)    | OUTBREAK            | 0.0112      | (1.57)    | YES      | 52.0   | 63   |

## Appendix IA6. Variable definitions

| Variable          | Description                                                                                                                     | Source                                    |
|-------------------|---------------------------------------------------------------------------------------------------------------------------------|-------------------------------------------|
| <i>CAR</i>        | Cumulative abnormal stock market (MSCI) return                                                                                  | Refinitiv                                 |
| <i>AVOLA</i>      | Abnormal stock market (MSCI) return volatility                                                                                  | Refinitiv                                 |
| <i>IDV</i>        | Individualism index                                                                                                             | Hofstede, Hofstede, and Minkov (2010)     |
| <i>UAI</i>        | Uncertainty avoidance index                                                                                                     | Hofstede, Hofstede, and Minkov (2010)     |
| <i>GDDPC</i>      | Gross domestic product per capita                                                                                               | World Bank                                |
| <i>DENS</i>       | Population per square kilometre of land                                                                                         | World Bank                                |
| <i>CCASE</i>      | Global cumulative infected cases                                                                                                | Statista                                  |
| <i>VIX</i>        | CBOE market volatility index                                                                                                    | Refinitiv                                 |
| <i>GDPGRW</i>     | GDP annual growth (2018)                                                                                                        | World Bank                                |
| <i>STRINGENCY</i> | Government stringency Index                                                                                                     | Hale et al. (2020)                        |
| <i>DEMO</i>       | The level of democracy                                                                                                          | Teorell et al. (2020)                     |
| <i>CORRUPT</i>    | Political corruption index                                                                                                      | Coppedge et al. (2020)                    |
| <i>SARS</i>       | An indicator variable for countries with SARS deaths in 2003                                                                    | Ru, Yang, and Zou (2020)                  |
| <i>OPEN</i>       | The ratio of a country's foreign trade over its GDP                                                                             | World Bank                                |
| <i>FOREIGN</i>    | The percentage of foreign investors ownership (end-2017)                                                                        | De la Cruz, Medina, and Tang (2019)       |
| <i>SERVICE</i>    | The value of the services sector as a proportion of a country's total GDP                                                       | World Bank                                |
| <i>DEATH</i>      | An indicator variable which equals one when there is at least one death in a country within the event window and zero otherwise | Johns Hopkins Coronavirus Resource Center |
| <i>OUTBREAK</i>   | An indicator variable equal one after the WHO COVID-19 outbreak declaration on January 30, 2020                                 |                                           |
